# Supplementary material
Source: PubMed Central journal article supplement (PMC4020086)
Supplement: 1323136111_pnas.201323136SI.pdf [file 1323136111_pnas.201323136SI.pdf]

**Table S1. Mutations and corresponding amino acid substitutions in the FMDV populations passaged at high multiplicity of infection in BHK-21 cells**

| Region analyzed*                     | FMDV population <sup>†</sup> |                          |                     |                                                    |                           |                       |                          | Amino acid <sup>‡</sup>                                        |
|--------------------------------------|------------------------------|--------------------------|---------------------|----------------------------------------------------|---------------------------|-----------------------|--------------------------|----------------------------------------------------------------|
|                                      |                              |                          |                     |                                                    | C-S8p260                  |                       |                          |                                                                |
|                                      | C-S8p50                      | C-S8p100                 | C-S8p143            | C-S8p200                                           | Δ417                      | Δ999                  | p3d                      |                                                                |
| 5'-UTR (1–1,038)                     |                              | C247U<br>C338U           | C247U<br>C338U      | C247U<br>C338U                                     | C247U<br>C338U            | C247U<br>C338U        | C247U<br>C338U           |                                                                |
|                                      | G476A                        | G476A                    | G476A               | G476A                                              | G476A<br>C511U/C<br>(75%) | G476A                 | G476A                    |                                                                |
|                                      | U856C                        | U856C                    | U856C               | U856C                                              | U856C                     | U856C                 | U518C<br>U856C<br>U1008C |                                                                |
| L (1,039–1,641)                      |                              | A1043G                   | —                   | G1066G/U (25%)                                     |                           | G1066U                | G1066U                   | <b>N25</b><br><b>V10L</b><br><b>P23S</b><br><b>K39M</b><br>Syn |
|                                      |                              |                          | C1105C/U (25%)      | A1154A/U (25%)<br>C1158C/A (25%)<br>C1180C/U (25%) | Δ417<br>Δ417<br>Δ417      | C1180U<br>A1628U      | C1180U<br>A1628U         | <b>H48Y</b><br><b>Q197L</b><br><b>T57A</b>                     |
|                                      | VP4 (1,642–1,896)            |                          |                     |                                                    | A1810G/A<br>(50%)         |                       | A1810G                   |                                                                |
| VP2 (1,897–2,550)                    |                              |                          |                     |                                                    | C2202U                    |                       | C2202U                   | Syn<br>Syn<br><b>G130D</b>                                     |
| VP3 (2,551–3,207)                    |                              | C2624U                   | C2624U              | C2624U                                             | C2624U                    | C2624U                | C2624U                   | Syn<br><b>A25V</b><br><b>R71S</b><br><b>A116V</b>              |
|                                      | C2897U/C (50%)               | —                        |                     | C3064G/C (75%)                                     | C3064G                    | Δ999                  | C3064G                   | <b>H172D</b>                                                   |
|                                      | G3067A<br>C3202A             | G3067A<br>C3202A         | G3067A<br>C3202A    | G3067A<br>C3202A                                   | G3067A<br>C3202A          | Δ999<br>Δ999          | G3067A<br>C3202A         | <b>E173K</b><br><b>Q218K</b>                                   |
| VP1 (3,208–3,834)                    |                              | A3328G                   | A3328G              | A3328G                                             | A3328G                    | Δ999                  | A3328G                   | <b>K41E</b><br><b>D46G</b><br><b>D46E</b>                      |
|                                      |                              | U3345A                   | —                   | A3344G/A (50%)                                     | A3344G                    | Δ999                  | A3344G                   |                                                                |
|                                      | A3668G/A (75%)               | —                        |                     | U3387C/U (75%)<br>U3433C                           | U3387C<br>U3433C          | Δ999<br>Δ999          | U3387C<br>U3433C         | Syn<br>Syn<br><b>H154R</b>                                     |
| 2B (3,883–4,344)<br>2C (4,345–5,298) | A3797A/G (25%)               | A3797G                   | A3797G              | A3797G                                             | A3797G                    | A3797G                | A3797G                   | <b>H197R</b>                                                   |
|                                      |                              |                          | G4583A              | A4036G/A (50%)<br>G4583A                           | A4036G<br>G4583A          | A4036G<br>G4583A      | A4036G<br>G4583A         | <b>T52A</b><br><b>S80N</b><br>Syn                              |
|                                      | C4748U/C (75%)               | G4650A<br>C4748U/C (75%) | —<br>C4748C/U (25%) | —                                                  |                           | C4824U/C<br>(50%)     | C4824U/C<br>(50%)        | <b>T135I</b><br>Syn                                            |
| 3A (5,299–5,757)                     |                              | G5295A                   | —                   | A5110G<br>G5133C                                   | A5110G<br>G5133C          | A5110G<br>G5133C      | A5110G<br>G5133C         | <b>T256A</b><br><b>Q263H</b><br><b>M283V</b>                   |
|                                      |                              |                          | U5454C/U (50%)      | A5191G/A (50%)                                     | A5191G                    | A5191G                | A5191G                   | Syn<br>Syn<br>Syn                                              |
|                                      | A5524G                       | —                        |                     | U5454C/U (50%)                                     | U5454U/C<br>(25%)         |                       | U5454C                   |                                                                |
| 3C (5,971–6,609)                     |                              |                          |                     | A5606G/A (50%)                                     | A5606G/A<br>(75%)         | A5606G                |                          | <b>I76V</b><br><b>D103G</b>                                    |
|                                      |                              | A5713G                   | —                   |                                                    | A5713G/A<br>(50%)         | A5713G/<br>A<br>(50%) | A5713G                   | <b>N139D</b>                                                   |
|                                      |                              | U6372C                   | —                   |                                                    |                           |                       |                          | Syn                                                            |

**Table S1. Cont.**

| Region analyzed* | FMDV population <sup>†</sup> |          |          |          |                   |                       |        | Amino acid <sup>‡</sup> |
|------------------|------------------------------|----------|----------|----------|-------------------|-----------------------|--------|-------------------------|
|                  | C-S8p50                      | C-S8p100 | C-S8p143 | C-S8p200 | C-S8p260          |                       |        |                         |
|                  |                              |          |          |          | Δ417              | Δ999                  | p3d    |                         |
| 3D (6,610–8,009) |                              |          |          |          | U6789U/C<br>(25%) | U6789U/<br>C<br>(25%) | U6789C | Syn                     |
|                  |                              | U6903C   | —        |          |                   |                       | C6840U | Syn                     |
|                  | G7554U                       | G7554U   | G7554U   | —        |                   |                       |        | Syn                     |
|                  |                              |          |          |          |                   |                       |        | Syn                     |

\*FMDV genomic region analyzed (residue numbering is according to ref. 1).

<sup>†</sup>The sequence of the entire viral genome was determined for C-S8p50, C-S8p100, C-S8p143, C-S8p200, and C-S8p260 (2). Mutations are relative to the sequence of the parental clone C-S8c1. Two residues separated by a bar indicate a mixture of two nucleotides in the population, according to the sequence peak pattern. The percentage indicates the proportion of the mutant. —, reversion of a mutation to the WT sequence.

<sup>‡</sup>Deduced amino acid substitutions relative to the sequence of the parental clone C-S8c1. Amino acid residues (single-letter code) are numbered individually for each protein from the N to the C terminus. Syn means synonymous mutation. Boldface type indicates a change in the amino acid residue. Procedures for nucleotide sequencing and identification of FMDV genomic regions are described in *Materials and Methods* of the main text.

1. Escarmis C, Dávila M, Domingo E (1999) Multiple molecular pathways for fitness recovery of an RNA virus debilitated by operation of Muller's ratchet. *J Mol Biol* 285(2):495–505.
2. García-Arriaza J, Ojosnegros S, Dávila M, Domingo E, Escarmis C (2006) Dynamics of mutation and recombination in a replicating population of complementing, defective viral genomes. *J Mol Biol* 360(3):558–572.

**Table S2. Mutations and corresponding amino acid substitutions in  $\Delta$ 417pa,  $\Delta$ 999pa,  $\Delta$ 417ev, and  $\Delta$ 999ev FMDV RNAs**

| Genomic region*   | FMDV genome <sup>†</sup> |                |                |                | Amino acid <sup>‡</sup> |
|-------------------|--------------------------|----------------|----------------|----------------|-------------------------|
|                   | $\Delta$ 417pa           | $\Delta$ 999pa | $\Delta$ 417ev | $\Delta$ 999ev |                         |
| 5'-UTR (1–1,038)  |                          | U467C          |                | U467C          |                         |
|                   | G476A                    | G476A          | G476A          | G476A          |                         |
|                   | C511U                    |                | C511U          |                |                         |
|                   | U856C                    | U856C          | U856C          | U856C          |                         |
| L (1,039–1,641)   |                          | C1025U         | C1025U         |                |                         |
|                   |                          | G1066U         |                | G1066U         | <b>V10L</b>             |
|                   |                          | C1180U         |                | C1180U         | <b>H48Y</b>             |
| VP2 (1,897–2,550) |                          | A1628U         |                | A1628U         | <b>Q197L</b>            |
|                   | C2202U                   |                | C2202U         |                | Syn                     |
|                   |                          | C2250U         |                | C2250U         | Syn                     |
| VP3 (2,551–3,207) |                          | G2285A         |                | G2285A         | <b>G130D</b>            |
|                   |                          | A2545G         |                | A2545G         | <b>K217E</b>            |
|                   |                          | U2622C         |                | U2622C         | Syn                     |
| VP1 (3,208–3,834) | C2624U                   | C2624U         | C2624U         | C2624U         | <b>A25V</b>             |
|                   |                          | G2763U         |                | G2763U         | <b>R71S</b>             |
|                   | C3064G                   |                | C3064G         |                | <b>H172D</b>            |
|                   | G3067A                   |                | G3067A         |                | <b>E173K</b>            |
|                   | C3202A                   |                | C3202A         |                | <b>Q218K</b>            |
|                   | A3328G                   |                | A3328G         |                | <b>K41E</b>             |
|                   | A3344G                   |                | A3344G         |                | <b>D46G</b>             |
|                   | U3387C                   |                | U3387C         |                | Syn                     |
|                   | U3433C                   |                | U3433C         |                | Syn                     |
|                   | C3539U                   |                | C3539U         |                | <b>P111L</b>            |
| U3753C            |                          | U3753C         |                | Syn            |                         |
| A3797G            | A3797G                   | A3797G         | A3797G         | <b>H197R</b>   |                         |
| 2B (3,883–4,344)  | A4036G                   | A4036G         | A4036G         | A4036G         | <b>T52A</b>             |
| 2C (4,345–5,298)  | —                        | —              | G4583A         | G4583A         | <b>S80N</b>             |
|                   | —                        | —              | C4824U         | C4824U         | Syn                     |
|                   | —                        | —              | —              | C4959U         | Syn                     |
|                   | —                        | —              | —              | A4988G         | <b>K215R</b>            |
|                   | —                        | —              | —              | C5040U         | Syn                     |
|                   | —                        | —              | A5110G         | A5110G         | <b>T256A</b>            |
|                   | —                        | —              | G5133C         | G5133C         | <b>Q263H</b>            |
|                   | —                        | —              | A5191G         | A5191G         | <b>M283V</b>            |
|                   | —                        | —              | C5214U         | —              | Syn                     |
|                   | 3A (5,299–5,757)         | —              | —              | A5606G         | A5606G                  |
| 3D (6,610–8,019)  | —                        | —              | —              | C7074U         | Syn                     |

\*FMDV genomic region; residue numbering is according to ref. 1.

<sup>†</sup>The sequence of the entire viral genome was determined for the indicated  $\Delta$ RNAs. Mutations are relative to the sequence of the parental clone C-58c1. The genomes are depicted in Fig. 2.

<sup>‡</sup>Deduced amino acid substitutions relative to the sequence of the parental clone C-58c1. Amino acid residues (single-letter code) are numbered individually for each protein from the N to the C terminus. Syn means synonymous mutation. Boldface type indicates a change in the amino acid residue. Procedures for nucleotide sequencing and identification of FMDV genomic regions are described in *Materials and Methods*.

1. Escarmis C, Dávila M, Domingo E (1999) Multiple molecular pathways for fitness recovery of an RNA virus debilitated by operation of Muller's ratchet. *J Mol Biol* 285(2):495–505.



**Table S3. Oligonucleotides used in the present study**

| Genomic region | Primer name | Sequence (5'-3')*                                   | Orientation <sup>†</sup> | Position <sup>‡</sup> |
|----------------|-------------|-----------------------------------------------------|--------------------------|-----------------------|
| 2B             | 2BR1        | TTGGTGTCTGCTTTTGAGGAAC                              | F                        | 3,988                 |
| 3C             | 3CD1        | CATGACCATCTTTTGAGGTCAG                              | R                        | 6,009                 |
| 3A             | 3AR3        | GATGACGTGAACCTCTGAGCCCGC                            | F                        | 5,704                 |
| 3D             | AV2new      | TGTGGAAGTGTCTTTTGAGGAAAG                            | R                        | 7,783                 |
| 2C             | mutSNu      | TTGAAGA <u>AC</u> GGGAACGTCCATATTGC                 | F                        | 4,576                 |
| 2C             | mutSNd      | CGTCCCGT <u>TCTT</u> CAAACACACTTGG                  | R                        | 4,591                 |
| 2C             | mutTAu      | GAAGACACCCACG <u>CCAAT</u> CCAGTGGC                 | F                        | 5,098                 |
| 2C             | mutTAd      | ACTGGATTGG <u>CGTGGG</u> TGTCTTCAAGTGC              | R                        | 5,120                 |
| 2C             | mutQHu      | GGCAATGTTTCACTACGACTGTGCCC                          | F                        | 5,121                 |
| 2C             | mutQHd      | GGCACAGTCGTAGTGAAACATTGCC                           | R                        | 5,145                 |
| 2C             | mutMVu      | GAGATTGCAACAGGAT <u>GTGTT</u> CAAGCCTCAACCACCCCTCCA | F                        | 5,175                 |
| 2C             | mutMVd      | GGGTGGTTGAGGCTTGAACACATCCTGTTGCAATCTCTTCATTTTC      | R                        | 5,211                 |
| 3A             | mutDGu      | CATCACCACCGATGGCCAGACACTTGACGAGGCGGAAAAG            | F                        | 5,592                 |
| 3A             | mutDGd      | CCGCCTCGTCAAGTGTCTGG <u>CCAT</u> CGGTGGTGATGTTTGC   | R                        | 5,626                 |
| L              | 5'Ncol-L    | GGGGCCCCATGGGCAATACTGACTGTTTTATC                    | F                        | 1,039                 |
| L              | 3'BamHI-L   | CCCGGGGATCCCTATCACTTGTAGCTTTCGCTGAACGCT             | R                        | 1,641                 |

\*Underlined letters are nucleotides that have been modified with respect to the genomic sequence of the FMDV C-58c1 to introduce the desired mutations.

<sup>†</sup>Genomic orientation of primer: forward (F) or reverse (R).

<sup>‡</sup>Position of the 5'-nucleotide of the primer; numbering of FMDV genomic residues is that described in ref. 1.

1. Escarmis C, Dávila M, Domingo E (1999) Multiple molecular pathways for fitness recovery of an RNA virus debilitated by operation of Muller's ratchet. *J Mol Biol* 285(2):495–505.

**Table S4. Comparison of the predicted size of proteins expressed from pMT28 and ΔRNAs**

| Virus | Proteins*             | Amino acid <sup>†</sup> | <i>M<sub>r</sub></i> (kDa) <sup>‡</sup> |
|-------|-----------------------|-------------------------|-----------------------------------------|
| pMT28 | P1-2A                 | 747                     | 81.5                                    |
|       | VP0                   | 303                     | 33.0                                    |
|       | VP3                   | 219                     | 23.9                                    |
|       | VP1                   | 209                     | 22.8                                    |
| Δ417  | <b>Δ417-Lab-P1-2A</b> | <b>809</b>              | <b>88.6</b>                             |
|       | <b>Δ417-Lb-P1-2A</b>  | <b>781</b>              | <b>85.5</b>                             |
|       | <b>Δ417-M-P1-2A</b>   | <b>771</b>              | <b>84.3</b>                             |
|       | <b>Δ417-Lab-VP0</b>   | <b>365</b>              | <b>40.1</b>                             |
|       | <b>Δ417-Lb-VP0</b>    | <b>337</b>              | <b>37.0</b>                             |
|       | <b>Δ417-M-VP0</b>     | <b>327</b>              | <b>35.8</b>                             |
|       | VP3                   | 219                     | 23.9                                    |
| VP1   | 209                   | 22.8                    |                                         |
| Δ999  | <b>Δ999-P1-2A</b>     | <b>414</b>              | <b>45.1</b>                             |
|       | VP0                   | 303                     | 33.0                                    |
|       | <b>Δ999-VP3</b>       | <b>81</b>               | <b>8.8</b>                              |
|       | <b>Δ999-VP1</b>       | <b>14</b>               | <b>1.6</b>                              |

\*The genomes and the predicted major precursors and mature proteins expressed from pMT28, Δ417, and Δ999 are depicted in Fig. 4 A–C. New proteins expected from the deletions in ΔRNAs are highlighted in bold.

<sup>†</sup>Deduced number of amino acids present in the expressed protein.

<sup>‡</sup>The expected molecular mass of major precursors and mature proteins was calculated based on the genomic sequences, excluding the deleted regions in the case of proteins expressed from ΔRNAs.
